# Supplementary material for: Investigating the Relationship between Telomere-Related Gene Variants and Leukocyte Telomere Length in Optic Neuritis Patients
Source: MDPI journal article supplement (doi:10.3390/jcm13092694), 2024-05-03
Supplement: s1 [file s1]

### Supplementary material

**Table S1.** Genotype and allele frequencies of single nucleotide polymorphisms (*TERF1* rs1545827, rs10107605 and *TERF2* rs251796) within ON and reference groups.

| Gene                         | Genotype/Allele   | ON group<br>(n=73)<br>N (%) | Control group<br>(n=170)<br>N (%) | p-value |
|------------------------------|-------------------|-----------------------------|-----------------------------------|---------|
| <i>TERF1</i><br>(rs1545827)  | CC                | 25 (34.2)                   | 58 (34.1)                         | 0.851   |
|                              | CT                | 40 (54.8)                   | 89 (52.4)                         |         |
|                              | TT                | 8 (11)                      | 23 (13.5)                         |         |
|                              | In total:         | 73 (100)                    | 170 (100)                         |         |
|                              | Allele:<br>C<br>T | 90 (61.6)<br>56 (38.4)      | 205 (60.3)<br>135 (39.7)          | 0.780   |
| <i>TERF1</i><br>(rs10107605) | AA                | 59 (80.8)                   | 140 (82.4)                        | 0.063   |
|                              | AC                | 14 (19.2)                   | 21 (12.4)                         |         |
|                              | CC                | 0 (0)                       | 9 (5.3)                           |         |
|                              | In total:         | 73 (100)                    | 170 (100)                         |         |
|                              | Allele:<br>A<br>C | 132 (90.4)<br>14 (9.6)      | 301 (88.5)<br>39 (11.5)           | 0.541   |
| <i>TERF2</i><br>(rs251796)   | AA                | 36 (49.3)                   | 86 (50.6)                         | 0.983   |
|                              | AG                | 29 (39.7)                   | 66 (38.8)                         |         |
|                              | GG                | 8 (11)                      | 18 (10.6)                         |         |
|                              | In total:         | 73 (100)                    | 170 (100)                         |         |
|                              | Allele:<br>A<br>G | 101 (69.2)<br>45 (30.8)     | 238 (70)<br>102 (30)              | 0.856   |

ON – optic neuritis; p-value: significance level ( $\alpha = 0.05$ ).

**Table S2.** Binary logistic regression analysis within patients with ON and reference group subjects.

| <i>TERF1</i> (rs1545827): |                     |                     |         |         |
|---------------------------|---------------------|---------------------|---------|---------|
| Model                     | Genotype/Allele     | OR (95% CI)         | p-value | AIC     |
| Codominant                | CT <i>vs.</i> CC    | 1.043 (0.573-1.898) | 0.891   | 300.720 |
|                           | TT <i>vs.</i> CC    | 0.807 (0.318-2.048) | 0.652   |         |
| Dominant                  | CT+TT <i>vs.</i> CC | 0.994 (0.558-1.772) | 0.994   | 299.049 |
| Recessive                 | TT <i>vs.</i> CC+CT | 0.787 (0.334-1.851) | 0.583   | 298.738 |
| Overdominant              | CT <i>vs.</i> CC+TT | 1.103 (0.636-1.913) | 0.727   | 298.927 |
| Additive                  | T                   | 0.938 (0.615-1.431) | 0.767   | 298.961 |
| <i>TERF2</i> (rs251796):  |                     |                     |         |         |
| Model                     | Genotype/Allele     | OR (95% CI)         | p-value | AIC     |
| Codominant                | AG <i>vs.</i> AA    | 1.050 (0.585-1.884) | 0.871   | 301.016 |
|                           | GG <i>vs.</i> AA    | 1.062 (0.423-2.662) | 0.898   |         |
| Dominant                  | AG+GG <i>vs.</i> AA | 1.052 (0.608-1.821) | 0.856   | 299.016 |

|              |                     |                     |       |         |
|--------------|---------------------|---------------------|-------|---------|
| Recessive    | GG <i>vs.</i> AA+AG | 1.039 (0.430-2.511) | 0.932 | 299.042 |
| Overdominant | AG <i>vs.</i> AA+GG | 1.039 (0.593-1.820) | 0.895 | 299.032 |
| Additive     | G                   | 1.037 (0.691-1.556) | 0.861 | 299.019 |

ON – Optical Neuritis; OR: odds ratio; CI: confidence interval; *p*-value: significance level (alpha = 0.05); AIC: Akaike information criterion; Statistically significant results marked in bold; The most robust genetic model underlined (selected based on the lowest AIC value).

**Table S3.** Genotype and allele frequencies of *TERF1* rs1545827 and *TERF2* rs251796 within ON and reference groups females.

| Gene                                | Genotype/Allele | ON group<br>(n=46)<br>N (%) | Control group<br>(n=125)<br>N (%) | p-value |
|-------------------------------------|-----------------|-----------------------------|-----------------------------------|---------|
| <b><i>TERF1</i><br/>(rs1545827)</b> | CC              | 15 (32.6)                   | 43 (34.4)                         | 0.173   |
|                                     | CT              | 28 (60.9)                   | 61 (48.8)                         |         |
|                                     | TT              | 3 (6.5)                     | 21 (16.8)                         |         |
|                                     | In total:       | 46 (100)                    | 125 (100)                         |         |
|                                     | Allele:         |                             |                                   | 0.477   |
|                                     | C               | 58 (63)                     | 147 (58.8)                        |         |
|                                     | T               | 34 (37)                     | 103 (41.2)                        |         |
| <b><i>TERF2</i><br/>(rs251796)</b>  | AA              | 25 (54.3)                   | 61 (48.8)                         | 0.748   |
|                                     | AG              | 17 (37)                     | 49 (39.2)                         |         |
|                                     | GG              | 4 (8.7)                     | 15 (12)                           |         |
|                                     | In total:       | 46 (100)                    | 125 (100)                         |         |
|                                     | Allele:         |                             |                                   | 0.430   |
|                                     | A               | 67 (72.8)                   | 171 (68.4)                        |         |
|                                     | G               | 25 (27.2)                   | 79 (31.6)                         |         |

ON – optic neuritis; *p*-value: significance level (alpha = 0.05).

**Table S4.** Binary logistic regression analysis within females with ON and reference group females.

| <b><i>TERF1</i> (rs1545827):</b> |                     |                     |         |         |
|----------------------------------|---------------------|---------------------|---------|---------|
| Model                            | Genotype/Allele     | OR (95% CI)         | p-value | AIC     |
| Codominant                       | CT <i>vs.</i> CC    | 1.316 (0.629-2.754) | 0.466   | 199.253 |
|                                  | TT <i>vs.</i> CC    | 0.410 (0.107-1.572) | 0.193   |         |
| Dominant                         | CT+TT <i>vs.</i> CC | 1.084 (0.528-2.223) | 0.826   | 201.087 |
| Recessive                        | TT <i>vs.</i> CC+CT | 0.346 (0.098-1.219) | 0.099   | 197.776 |
| Overdominant                     | CT <i>vs.</i> CC+TT | 1.632 (0.820-3.248) | 0.163   | 199.159 |
| Additive                         | T                   | 0.823 (0.491-1.378) | 0.459   | 200.582 |
| <b><i>TERF2</i> (rs251796):</b>  |                     |                     |         |         |
| Model                            | Genotype/Allele     | OR (95% CI)         | p-value | AIC     |
| Codominant                       | AG <i>vs.</i> AA    | 0.847 (0.411-1.742) | 0.651   | 202.541 |
|                                  | GG <i>vs.</i> AA    | 0.651 (0.197-2.154) | 0.482   |         |
| Dominant                         | AG+GG <i>vs.</i> AA | 0.801 (0.406-1.577) | 0.520   | 200.721 |
| Recessive                        | GG <i>vs.</i> AA+AG | 0.698 (0.219-2.225) | 0.544   | 200.747 |
| Overdominant                     | AG <i>vs.</i> AA+GG | 0.909 (0.452-1.828) | 0.789   | 201.064 |

|          |   |                     |       |         |
|----------|---|---------------------|-------|---------|
| Additive | G | 0.821 (0.493-1.369) | 0.450 | 200.554 |
|----------|---|---------------------|-------|---------|

ON – Optical Neuritis; OR: odds ratio; CI: confidence interval; *p*-value: significance level (alpha = 0.05); AIC: Akaike information criterion; Statistically significant results marked in bold; The most robust genetic model underlined (selected based on the lowest AIC value).

**Table S5.** Genotype and allele frequencies of *TERF1* rs1545827 and *TERF2* rs251796 within ON and reference groups males.

| Gene                                | Genotype/Allele | ON group<br>(n=27)<br>N (%) | Control group<br>(n=45)<br>N (%) | p-value |
|-------------------------------------|-----------------|-----------------------------|----------------------------------|---------|
| <b><i>TERF1</i><br/>(rs1545827)</b> | CC              | 10 (37)                     | 15 (33.3)                        | 0.107   |
|                                     | CT              | 12 (44.4)                   | 28 (62.2)                        |         |
|                                     | TT              | 5 (18.5)                    | 2 (4.4)                          |         |
|                                     | In total:       | 27 (100)                    | 45 (100)                         |         |
|                                     | Allele:         |                             |                                  | 0.533   |
|                                     | C               | 32 (59.3)                   | 58 (64.4)                        |         |
|                                     | T               | 22 (40.7)                   | 32 (35.6)                        |         |
| <b><i>TERF2</i><br/>(rs251796)</b>  | AA              | 11 (40.7)                   | 25 (55.6)                        | 0.354   |
|                                     | AG              | 12 (44.4)                   | 17 (37.8)                        |         |
|                                     | GG              | 4 (14.8)                    | 3 (6.7)                          |         |
|                                     | In total:       | 27 (100)                    | 45 (100)                         |         |
|                                     | Allele:         |                             |                                  | 0.144   |
|                                     | A               | 34 (63)                     | 67 (74.4)                        |         |
|                                     | G               | 20 (37)                     | 23 (25.6)                        |         |

ON – optic neuritis; *p*-value: significance level (alpha = 0.05).

**Table S6.** Binary logistic regression analysis within males with ON and reference group males.

| <b><i>TERF1</i> (rs1545827):</b> |                     |                      |         |        |
|----------------------------------|---------------------|----------------------|---------|--------|
| Model                            | Genotype/Allele     | OR (95% CI)          | p-value | AIC    |
| Codominant                       | CT <i>vs.</i> CC    | 0.643 (0.225-1.833)  | 0.408   | 94.896 |
|                                  | TT <i>vs.</i> CC    | 3.750 (0.605-23.252) | 0.156   |        |
| Dominant                         | CT+TT <i>vs.</i> CC | 0.850 (0.314-2.304)  | 0.749   | 97.163 |
| Recessive                        | TT <i>vs.</i> CC+CT | 4.886 (0.876-27.245) | 0.070   | 93.577 |
| Overdominant                     | CT <i>vs.</i> CC+TT | 0.486 (0.184-1.280)  | 0.144   | 95.105 |
| Additive                         | T                   | 1.312 (0.605-2.848)  | 0.492   | 96.790 |
| <b><i>TERF2</i> (rs251796):</b>  |                     |                      |         |        |
| Model                            | Genotype/Allele     | OR (95% CI)          | p-value | AIC    |
| Codominant                       | AG <i>vs.</i> AA    | 1.604 (0.576-4.468)  | 0.366   | 97.213 |
|                                  | GG <i>vs.</i> AA    | 3.030 (0.578-15.880) | 0.190   |        |
| Dominant                         | AG+GG <i>vs.</i> AA | 1.818 (0.691-4.782)  | 0.226   | 95.777 |
| Recessive                        | GG <i>vs.</i> AA+AG | 2.435 (0.501-11.832) | 0.270   | 96.034 |
| Overdominant                     | AG <i>vs.</i> AA+GG | 1.318 (0.500-3.473)  | 0.577   | 96.954 |
| Additive                         | G                   | 1.692 (0.816-3.507)  | 0.158   | 95.234 |

ON – Optical Neuritis; OR: odds ratio; CI: confidence interval; *p*-value: significance level (alpha = 0.05); AIC: Akaike information criterion; Statistically significant results marked in bold; The most robust genetic model underlined (selected based on the lowest AIC value).

**Table S7.** Genotype and allele frequencies of *TERF1* rs1545827 and *TERF2* rs251796 within ON and reference groups subjects (age≤30).

| Gene                                | Genotype/Allele | ON group<br>(n=33)<br>N (%) | Control group<br>(n=89)<br>N (%) | p-value |
|-------------------------------------|-----------------|-----------------------------|----------------------------------|---------|
| <b><i>TERF1</i><br/>(rs1545827)</b> | CC              | 15 (45.5)                   | 31 (34.8)                        | 0.373   |
|                                     | CT              | 17 (51.5)                   | 50 (56.2)                        |         |
|                                     | TT              | 1 (3)                       | 8 (9)                            |         |
|                                     | In total:       | 33 (100)                    | 89 (100)                         |         |
|                                     | Allele:         |                             |                                  | 0.227   |
|                                     | C               | 47 (71.2)                   | 112 (62.9)                       |         |
|                                     | T               | 19 (28.8)                   | 66 (37.1)                        |         |
| <b><i>TERF2</i><br/>(rs251796)</b>  | AA              | 15 (45.5)                   | 44 (49.4)                        | 0.544   |
|                                     | AG              | 16 (48.5)                   | 35 (39.3)                        |         |
|                                     | GG              | 2 (6.1)                     | 10 (11.2)                        |         |
|                                     | In total:       | 33 (100)                    | 89 (100)                         |         |
|                                     | Allele:         |                             |                                  | 0.928   |
|                                     | A               | 46 (69.7)                   | 123 (69.1)                       |         |
|                                     | G               | 20 (30.3)                   | 55 (30.9)                        |         |

ON – optic neuritis; *p*-value: significance level (alpha = 0.05).

**Table S8.** Binary logistic regression analysis within patients with ON and reference group subjects (age≤30).

| <b><i>TERF1</i> (rs1545827):</b> |                     |                     |         |         |
|----------------------------------|---------------------|---------------------|---------|---------|
| Model                            | Genotype/Allele     | OR (95% CI)         | p-value | AIC     |
| Codominant                       | CT <i>vs.</i> CC    | 0.703 (0.308-1.606) | 0.403   | 144.263 |
|                                  | TT <i>vs.</i> CC    | 0.258 (0.030-2.259) | 0.221   |         |
| Dominant                         | CT+TT <i>vs.</i> CC | 0.641 (0.285-1.445) | 0.284   | 143.293 |
| Recessive                        | TT <i>vs.</i> CC+CT | 0.316 (0.038-2.633) | 0.287   | 142.961 |
| Overdominant                     | CT <i>vs.</i> CC+TT | 0.829 (0.372-1.846) | 0.646   | 144.223 |
| Additive                         | T                   | 0.622 (0.312-1.240) | 0.177   | 142.558 |
| <b><i>TERF2</i> (rs251796):</b>  |                     |                     |         |         |
| Model                            | Genotype/Allele     | OR (95% CI)         | p-value | AIC     |
| Codominant                       | AG <i>vs.</i> AA    | 1.341 (0.583-3.083) | 0.490   | 145.162 |
|                                  | GG <i>vs.</i> AA    | 0.587 (0.115-2.986) | 0.521   |         |
| Dominant                         | AG+GG <i>vs.</i> AA | 1.173 (0.526-2.615) | 0.696   | 144.281 |
| Recessive                        | GG <i>vs.</i> AA+AG | 0.510 (0.106-2.460) | 0.401   | 143.639 |
| Overdominant                     | AG <i>vs.</i> AA+GG | 1.452 (0.650-3.246) | 0.363   | 143.610 |
| Additive                         | G                   | 0.973 (0.530-1.787) | 0.929   | 144.426 |

ON – Optical Neuritis; OR: odds ratio; CI: confidence interval; *p* value: significance level (alpha = 0.05); AIC: Akaike information criterion; Statistically significant results marked in bold; The most robust genetic model underlined (selected based on the lowest AIC value).

**Table S9.** Genotype and allele frequencies of *TERF1* rs1545827 and *TERF2* rs251796 within ON and reference groups subjects (age>30).

| Gene                         | Genotype/Allele   | ON group<br>(n=40)<br>N (%) | Control group<br>(n=81)<br>N (%) | p-value |
|------------------------------|-------------------|-----------------------------|----------------------------------|---------|
| <b>TERF1<br/>(rs1545827)</b> | CC                | 10 (25)                     | 27 (33.3)                        | 0.583   |
|                              | CT                | 23 (57.5)                   | 39 (48.1)                        |         |
|                              | TT                | 7 (17.5)                    | 15 (18.5)                        |         |
|                              | In total:         | 40 (100)                    | 81 (100)                         |         |
|                              | Allele:<br>C<br>T | 43 (53.8)<br>37 (46.2)      | 93 (57.4)<br>69 (42.6)           | 0.589   |
| <b>TERF2<br/>(rs251796)</b>  | AA                | 21 (52.5)                   | 42 (51.9)                        | 0.652   |
|                              | AG                | 13 (32.5)                   | 31 (38.3)                        |         |
|                              | GG                | 6 (15)                      | 8 (9.9)                          |         |
|                              | In total:         | 40 (100)                    | 81 (100)                         |         |
|                              | Allele:<br>A<br>G | 55 (68.8)<br>25 (31.2)      | 115 (71)<br>47 (29)              | 0.720   |

ON – optic neuritis; p-value: significance level (alpha = 0.05).

**Table S10.** Binary logistic regression analysis within patients with ON and reference group subjects (age>30).

| <b>TERF1 (rs1545827):</b> |                     |                     |         |         |
|---------------------------|---------------------|---------------------|---------|---------|
| Model                     | Genotype/Allele     | OR (95% CI)         | p-value | AIC     |
| Codominant                | CT <i>vs.</i> CC    | 1.592 (0.654-3.877) | 0.306   | 156.477 |
|                           | TT <i>vs.</i> CC    | 1.260 (0.397-3.995) | 0.695   |         |
| Dominant                  | CT+TT <i>vs.</i> CC | 1.500 (0.640-3.516) | 0.351   | 154.676 |
| Recessive                 | TT <i>vs.</i> CC+CT | 0.933 (0.347-2.511) | 0.891   | 155.551 |
| Overdominant              | CT <i>vs.</i> CC+TT | 1.457 (0.679-3.126) | 0.334   | 154.630 |
| Additive                  | T                   | 1.167 (0.673-2.026) | 0.582   | 155.267 |
| <b>TERF2 (rs251796):</b>  |                     |                     |         |         |
| Model                     | Genotype/Allele     | OR (95% CI)         | p-value | AIC     |
| Codominant                | AG <i>vs.</i> AA    | 0.839 (0.365-1.929) | 0.679   | 156.735 |
|                           | GG <i>vs.</i> AA    | 1.500 (0.460-4.887) | 0.501   |         |
| Dominant                  | AG+GG <i>vs.</i> AA | 0.974 (0.456-2.080) | 0.946   | 155.566 |
| Recessive                 | GG <i>vs.</i> AA+AG | 1.610 (0.518-5.005) | 0.410   | 154.907 |
| Overdominant              | AG <i>vs.</i> AA+GG | 0.777 (0.349-1.727) | 0.535   | 155.181 |
| Additive                  | G                   | 1.099 (0.635-1.899) | 0.736   | 155.457 |

ON – Optical Neuritis; OR: odds ratio; CI: confidence interval; p value: significance level (alpha = 0.05); AIC: Akaike information criterion; Statistically significant results marked in bold; The most robust genetic model underlined (selected based on the lowest AIC value).

**Table S11.** Frequencies of genotypes and alleles of *TERF1* rs1545827 and *TERF2* rs251796 in the long and short telomere groups (T/S median=0.517).

| Gene | Genotype/Allele | Long<br>telomeres | Short<br>telomeres | p-value |
|------|-----------------|-------------------|--------------------|---------|
|------|-----------------|-------------------|--------------------|---------|

|                              |           |            |            |       |
|------------------------------|-----------|------------|------------|-------|
|                              |           |            |            |       |
| <b>TERF1<br/>(rs1545827)</b> | CC        | 43 (35)    | 40 (33.3)  | 0.806 |
|                              | CT        | 66 (53.7)  | 63 (52.5)  |       |
|                              | TT        | 14 (11.4)  | 17 (14.2)  |       |
|                              | In total: | 123 (100)  | 120 (100)  |       |
|                              | Allele:   |            |            | 0.618 |
|                              | C         | 152 (61.8) | 143 (59.6) |       |
|                              | T         | 94 (38.2)  | 97 (40.4)  |       |
|                              | In total: | 123 (100)  | 120 (100)  |       |
| <b>TERF2<br/>(rs251796)</b>  | AA        | 65 (52.8)  | 57 (47.5)  | 0.573 |
|                              | AG        | 47 (38.2)  | 48 (40)    |       |
|                              | GG        | 11 (8.9)   | 15 (12.5)  |       |
|                              | In total: | 123 (100)  | 120 (100)  |       |
|                              | Allele:   |            |            | 0.285 |
|                              | A         | 177 (72)   | 162 (67.5) |       |
|                              | G         | 69 (28)    | 78 (32.5)  |       |
|                              | In total: | 123 (100)  | 120 (100)  |       |

ON – optic neuritis; *p*-value: significance level (alpha = 0.05).

**Table S12.** Binary logistic regression analysis of *TERF1* rs1545827 and *TERF2* rs251796 in telomere shortening.

| <b>TERF1 (rs1545827):</b> |                     |                     |         |         |
|---------------------------|---------------------|---------------------|---------|---------|
| Model                     | Genotype/Allele     | OR (95% CI)         | p-value | AIC     |
| Codominant                | CT <i>vs.</i> CC    | 0.975 (0.561-1.692) | 0.927   | 340.401 |
|                           | TT <i>vs.</i> CC    | 0.766 (0.335-1.753) | 0.528   |         |
| Dominant                  | CT+TT <i>vs.</i> CC | 0.930 (0.547-1.581) | 0.789   | 338.761 |
| Recessive                 | TT <i>vs.</i> CC+CT | 0.778 (0.365-1.659) | 0.516   | 338.409 |
| Overdominant              | CT <i>vs.</i> CC+TT | 1.048 (0.633-1.734) | 0.856   | 338.800 |
| Additive                  | T                   | 0.901 (0.612-1.327) | 0.597   | 338.553 |
| <b>TERF2 (rs251796):</b>  |                     |                     |         |         |
| Model                     | Genotype/Allele     | OR (95% CI)         | p-value | AIC     |
| Codominant                | AG <i>vs.</i> AA    | 0.859 (0.502-1.469) | 0.578   | 339.716 |
|                           | GG <i>vs.</i> AA    | 0.643 (0.273-1.513) | 0.312   |         |
| Dominant                  | AG+GG <i>vs.</i> AA | 0.807 (0.488-1.336) | 0.405   | 338.138 |
| Recessive                 | GG <i>vs.</i> AA+AG | 0.688 (0.302-1.565) | 0.372   | 338.026 |
| Overdominant              | AG <i>vs.</i> AA+GG | 0.928 (0.554-1.553) | 0.775   | 338.751 |
| Additive                  | G                   | 0.821 (0.564-1.195) | 0.303   | 337.768 |

ON – Optical Neuritis; OR: odds ratio; CI: confidence interval; *p* value: significance level (alpha = 0.05); AIC: Akaike information criterion; Statistically significant results marked in bold; The most robust genetic model underlined (selected based on the lowest AIC value).

**Table S13.** Frequencies of genotypes and alleles of *TERF1* rs1545827 and *TERF2* rs251796 in the long and short telomere groups for females (T/S median=0.517).

| Gene | Genotype/Allele | Long telomeres | Short telomeres | p-value |
|------|-----------------|----------------|-----------------|---------|
|------|-----------------|----------------|-----------------|---------|

|                              |                   |                         |                         |       |
|------------------------------|-------------------|-------------------------|-------------------------|-------|
| <b>TERF1<br/>(rs1545827)</b> | CC                | 30 (34.1)               | 28 (33.7)               | 0.988 |
|                              | CT                | 46 (52.3)               | 43 (51.8)               |       |
|                              | TT                | 12 (13.6)               | 12 (14.5)               |       |
|                              | In total:         | 88 (100)                | 83 (100)                |       |
|                              | Allele:<br>C<br>T | 106 (60.2)<br>70 (39.8) | 99 (59.6)<br>67 (40.4)  | 0.911 |
| <b>TERF2<br/>(rs251796)</b>  | AA                | 42 (47.7)               | 44 (53)                 | 0.183 |
|                              | AG                | 39 (44.3)               | 27 (32.5)               |       |
|                              | GG                | 7 (8)                   | 12 (14.5)               |       |
|                              | In total:         | 88 (100)                | 83 (100)                |       |
|                              | Allele:<br>A<br>G | 123 (69.9)<br>53 (30.1) | 115 (69.3)<br>51 (30.7) | 0.902 |

ON – optic neuritis; *p*-value: significance level (alpha = 0.05).

**Table S14.** Binary logistic regression analysis of *TERF1* rs1545827 and *TERF2* rs251796 in telomere shortening in females.

| <b>TERF1 (rs1545827):</b> |                     |                     |         |         |
|---------------------------|---------------------|---------------------|---------|---------|
| Model                     | Genotype/Allele     | OR (95% CI)         | p-value | AIC     |
| Codominant                | CT <i>vs.</i> CC    | 0.998 (0.515-1.935) | 0.996   | 240.886 |
|                           | TT <i>vs.</i> CC    | 0.933 (0.360-2.417) | 0.887   |         |
| Dominant                  | CT+TT <i>vs.</i> CC | 0.984 (0.522-1.855) | 0.961   | 238.908 |
| Recessive                 | TT <i>vs.</i> CC+CT | 0.934 (0.394-2.214) | 0.877   | 238.886 |
| Overdominant              | CT <i>vs.</i> CC+TT | 1.019 (0.559-1.857) | 0.951   | 238.906 |
| Additive                  | T                   | 0.974 (0.619-1.530) | 0.908   | 238.897 |
| <b>TERF2 (rs251796):</b>  |                     |                     |         |         |
| Model                     | Genotype/Allele     | OR (95% CI)         | p-value | AIC     |
| Codominant                | AG <i>vs.</i> AA    | 1.513 (0.792-2.892) | 0.210   | 237.484 |
|                           | GG <i>vs.</i> AA    | 0.611 (0.220-1.701) | 0.346   |         |
| Dominant                  | AG+GG <i>vs.</i> AA | 1.236 (0.678-2.253) | 0.490   | 238.433 |
| Recessive                 | GG <i>vs.</i> AA+AG | 0.511 (0.191-1.369) | 0.511   | 237.067 |
| Overdominant              | AG <i>vs.</i> AA+GG | 1.651 (0.886-3.077) | 0.115   | 236.395 |
| Additive                  | G                   | 0.974 (0.626-1.515) | 0.907   | 238.896 |

ON – Optical Neuritis; OR: odds ratio; CI: confidence interval; *p* value: significance level (alpha = 0.05); AIC: Akaike information criterion; Statistically significant results marked in bold; The most robust genetic model underlined (selected based on the lowest AIC value).

**Table S15.** Frequencies of genotypes and alleles of *TERF1* rs1545827 and *TERF2* rs251796 in the long and short telomere groups for subjects aged ≤30 (T/S median=0.517).

| Gene                         | Genotype/Allele | Long telomeres<br>1 | Short telomeres<br>0 | p-value |
|------------------------------|-----------------|---------------------|----------------------|---------|
| <b>TERF1<br/>(rs1545827)</b> | CC              | 25 (36.8)           | 21 (38.9)            | 0.787   |
|                              | CT              | 37 (54.4)           | 30 (55.6)            |         |

|                             |           |           |           |       |
|-----------------------------|-----------|-----------|-----------|-------|
|                             | TT        | 6 (8.8)   | 3 (5.6)   | 0.660 |
|                             | In total: | 68 (100)  | 54 (100)  |       |
|                             | Allele:   |           |           |       |
|                             | C         | 87 (64)   | 72 (66.7) |       |
|                             | T         | 49 (36)   | 36 (33.3) |       |
| <b>TERF2<br/>(rs251796)</b> | AA        | 33 (48.5) | 26 (48.1) | 0.911 |
|                             | AG        | 29 (42.6) | 22 (40.7) |       |
|                             | GG        | 6 (8.8)   | 6 (11.1)  |       |
|                             | In total: | 68 (100)  | 54 (100)  |       |
|                             | Allele:   |           |           | 0.822 |
|                             | A         | 95 (69.9) | 74 (68.5) |       |
|                             | G         | 41 (30.1) | 34 (31.5) |       |

ON – optic neuritis; *p*-value: significance level (alpha = 0.05).

**Table S16.** Binary logistic regression analysis of *TERF1* rs1545827 and *TERF2* rs251796 in telomere shortening for subjects aged≤30.

| <b>TERF1 (rs1545827):</b> |                     |                     |         |         |
|---------------------------|---------------------|---------------------|---------|---------|
| Model                     | Genotype/Allele     | OR (95% CI)         | p-value | AIC     |
| Codominant                | CT <i>vs.</i> CC    | 1.036 (0.487-2.202) | 0.927   | 171.028 |
|                           | TT <i>vs.</i> CC    | 1.680 (0.374-7.548) | 0.499   |         |
| Dominant                  | CT+TT <i>vs.</i> CC | 1.095 (0.524-2.286) | 0.810   | 169.460 |
| Recessive                 | TT <i>vs.</i> CC+CT | 1.645 (0.392-6.906) | 0.496   | 169.036 |
| Overdominant              | CT <i>vs.</i> CC+TT | 0.955 (0.466-1.958) | 0.900   | 169.502 |
| Additive                  | T                   | 1.163 (0.639-2.115) | 0.622   | 169.274 |
| <b>TERF2 (rs251796):</b>  |                     |                     |         |         |
| Model                     | Genotype/Allele     | OR (95% CI)         | p-value | AIC     |
| Codominant                | AG <i>vs.</i> AA    | 1.039 (0.488-2.211) | 0.922   | 171.332 |
|                           | GG <i>vs.</i> AA    | 0.788 (0.227-2.730) | 0.707   |         |
| Dominant                  | AG+GG <i>vs.</i> AA | 0.985 (0.482-2.013) | 0.967   | 169.516 |
| Recessive                 | GG <i>vs.</i> AA+AG | 0.774 (0.235-2.552) | 0.674   | 169.341 |
| Overdominant              | AG <i>vs.</i> AA+GG | 1.082 (0.524-2.233) | 0.832   | 169.473 |
| Additive                  | G                   | 0.940 (0.547-1.617) | 0.824   | 169.468 |

ON – Optical Neuritis; OR: odds ratio; CI: confidence interval; *p* value: significance level (alpha = 0.05); AIC: Akaike information criterion; Statistically significant results marked in bold; The most robust genetic model underlined (selected based on the lowest AIC value).

**Table S17.** Frequencies of genotypes and alleles of *TERF1* rs1545827 and *TERF2* rs251796 in the long and short telomere groups for subjects aged>30 (T/S median=0.517).

| Gene                         | Genotype/Allele | Long telomeres | Short telomeres | p-value |
|------------------------------|-----------------|----------------|-----------------|---------|
| <b>TERF1<br/>(rs1545827)</b> | CC              | 18 (32.7)      | 19 (28.8)       | 0.628   |
|                              | CT              | 29 (52.7)      | 33 (50)         |         |
|                              | TT              | 8 (14.5)       | 14 (21.2)       |         |
|                              | In total:       | 55 (100)       | 66 (100)        |         |



|                             |                   |                        |                        |       |
|-----------------------------|-------------------|------------------------|------------------------|-------|
|                             | Allele:<br>C<br>T | 65 (59.1)<br>45 (40.9) | 71 (53.8)<br>61 (46.2) | 0.407 |
| <b>TERF2<br/>(rs251796)</b> | AA                | 32 (58.2)              | 31 (47)                | 0.443 |
|                             | AG                | 18 (32.7)              | 26 (39.4)              |       |
|                             | GG                | 5 (9.1)                | 9 (13.6)               |       |
|                             | In total:         | 55 (100)               | 66 (100)               |       |
|                             | Allele:<br>A<br>G | 82 (74.5)<br>28 (25.5) | 88 (66.7)<br>44 (33.3) | 0.181 |

ON – optic neuritis; *p*-value: significance level (alpha = 0.05).

**Table S18.** Binary logistic regression analysis of *TERF1* rs1545827 and *TERF2* rs251796 in telomere shortening for subjects aged>30.

| <b>TERF1 (rs1545827):</b> |                        |                     |                |            |
|---------------------------|------------------------|---------------------|----------------|------------|
| <b>Model</b>              | <b>Genotype/Allele</b> | <b>OR (95% CI)</b>  | <b>p-value</b> | <b>AIC</b> |
| Codominant                | CT <i>vs.</i> CC       | 0.928 (0.411-2.096) | 0.857          | 169.799    |
|                           | TT <i>vs.</i> CC       | 0.603 (0.204-1.779) | 0.360          |            |
| Dominant                  | CT+TT <i>vs.</i> CC    | 0.831 (0.383-1.804) | 0.640          | 168.521    |
| Recessive                 | TT <i>vs.</i> CC+CT    | 0.632 (0.244-1.641) | 0.346          | 167.832    |
| Overdominant              | CT <i>vs.</i> CC+TT    | 1.115 (0.545-2.283) | 0.765          | 168.651    |
| Additive                  | T                      | 0.798 (0.472-1.348) | 0.399          | 168.024    |
| <b>TERF2 (rs251796):</b>  |                        |                     |                |            |
| <b>Model</b>              | <b>Genotype/Allele</b> | <b>OR (95% CI)</b>  | <b>p-value</b> | <b>AIC</b> |
| Codominant                | AG <i>vs.</i> AA       | 0.671 (0.308-1.460) | 0.314          | 169.104    |
|                           | GG <i>vs.</i> AA       | 0.538 (0.162-1.786) | 0.311          |            |
| Dominant                  | AG+GG <i>vs.</i> AA    | 0.637 (0.309-1.310) | 0.220          | 167.225    |
| Recessive                 | GG <i>vs.</i> AA+AG    | 0.633 (0.199-2.015) | 0.439          | 168.124    |
| Overdominant              | AG <i>vs.</i> AA+GG    | 0.748 (0.354-1.583) | 0.448          | 168.162    |
| Additive                  | G                      | 0.712 (0.418-1.213) | 0.212          | 167.147    |

ON – Optical Neuritis; OR: odds ratio; CI: confidence interval; *p* value: significance level (alpha = 0.05); AIC: Akaike information criterion; Statistically significant results marked in bold; The most robust genetic model underlined (selected based on the lowest AIC value).
